# Supplementary material for: Accounting for in situ air cleaner utilization and performance to improve interpretation of patient outcomes in real-world indoor air cleaner intervention trials
Source: Royal Society of Chemistry journal article supplement (doi:10.1039/d4em00648h), 2024-12-26
Supplement: d4em00648h1.xlsx [file d4em00648h1.xlsx]

## Sheet: filtered
Search term	Relevant?	Study loc	Smokers?	Population	Outcome	Age	NCT Number	Study Title	Study URL	Acronym	Study Status	Study Status	Brief Summary	Study Results	Conditions	Interventions	Primary Outcome Measures	Secondary Outcome Measures	Other Outcome Measures	Follow up days	Sponsor	Collaborators	Sex	Phases	Enrollment	Funder Type	Study Type	Study Design	Other IDs	Start Date	Primary Completion Date	Completion Date	First Posted	Results First Posted	Last Update Posted	Location	Locations	Study Documents
"air purifier"	Y	Homes		Children	Asthma	CHILD	NCT05817357	Use of Air Purifiers to Improve Respiratory Health in Children	https://clinicaltrials.gov/study/NCT05817357		ACTIVE_NOT_RECRUITING	Active, not recruiting	The goal of this pilot study is to investigate if installing an air purifier in the homes of children and young people with asthma improves their asthma outcomes. The main questions it aims to answer are: * Does installing an air purifier in the homes of children and young people with asthma improve their asthma outcomes * Is the use of an air purifier in the home acceptable to children and young…	NO	Asthma in Children	DEVICE: Rensair Compact air purifier unit	Number of asthma exacerbations (asthma attacks), Asthma attacks and unscheduled healthcare visits due to acute asthma (including ED attendance, admission, GP/primary care attendance) - assessed by questionnaire and hospital-recorded attendances/admissions, 12 months|Number of rescue oral steroid courses, Number of rescue oral steroid courses - assessed by questionnaire and prescription data, 12 m…			365	University of Liverpool		ALL	NA	20	OTHER	INTERVENTIONAL	Allocation: NA|Intervention Model: SINGLE_GROUP|Masking: NONE|Primary Purpose: OTHER	UoL001754	2023-05-02	2024-07-30	2024-07-30	2023-04-18		2024-06-12	UK	Alder Hey Children's Hospital, Liverpool, Merseyside, L12 2AP, United Kingdom
"air purifier"	Y	Homes		Adults	Cardiovascular	OLDER_ADULT	NCT05867381	Using Indoor Air Filtration to Slow Atherothrombosis Progression in Adults With Ischemic Heart Disease History	https://clinicaltrials.gov/study/NCT05867381	SAPIA	RECRUITING	Recruiting	This double-blind, randomized, crossover trial aims to test the hypothesis that longer-term indoor air filtration intervention can slow atherothrombosis progression by reducing indoor fine particulate matter (PM2.5) exposure in adults with ischemic heart disease history.	NO	Air Pollution|Atherosclerosis	DEVICE: HEPA filtration|DEVICE: Sham filtration	Change in blood pressure, Differences between baseline and systolic and diastolic blood pressure measured during and after intervention, Blood pressure will be monitored daily during each of the 9-month intervention|Change in carotid-femoral pulse wave velocity, Differences between baseline and carotid-femoral pulse wave velocity measured with Vicorder device during and after intervention, At the…	Change in fasting glucose, Differences between baseline and fasting glucose measured during and after intervention, At the baseline, in the middle (4.5 month after intervention) and immediately after each of the 9-month interventions|Change in fasting insulin, Differences between baseline and fasting insulin measured during and after intervention, At the baseline, in the middle (4.5 month after i…			University of Southern California	Duke University|National Institute of Environmental Health Sciences (NIEHS)	ALL	NA	112	OTHER	INTERVENTIONAL	Allocation: RANDOMIZED|Intervention Model: CROSSOVER|Masking: DOUBLE (PARTICIPANT, INVESTIGATOR)|Primary Purpose: PREVENTION	SAPIA_Study|R01ES033707	2023-07-11	2027-06-30	2027-06-30	2023-05-22		2023-09-26	USA	Keck School of Medicine, University of Southern California, Los Angeles, California, 90033, United States
"air purifier"	Y	Homes		Adults	Cardiometabolic	ADULT, OLDER_ADULT	NCT04103346	Reducing Particulate Matter-associated Cardiovascular Health Effects for Seniors	https://clinicaltrials.gov/study/NCT04103346	RAPIDS2-Ypsi	RECRUITING	Recruiting	Exposure to fine particulate matter (PM2.5) air pollution is an established risk factor for cardiovascular (CV) morbidity.	NO	Cardiometabolic Health	OTHER: air filtration with air purifier with hepa filter|OTHER: sham	Systolic Blood Pressure, Blood pressure taken in the morning (mm Hg), 4 weeks	Atmospheric particulate matter (pm2.5), Atmospheric particulate matter is measured in the units of ug/m3 and determined using a portable analyzer (PDR-1500), 4 weeks|24-hr Blood Pressure, blood pressure response over 24 hours measured in the units mm Hg., 4 weeks|Nocturnal Blood Pressure, Blood pressure taken at night measured in the units mm Hg., 4 weeks|Aortic Hemodynamics, Determined using pul…			University of Michigan	Michigan State University|National Institute of Nursing Research (NINR)	ALL	NA	55	OTHER	INTERVENTIONAL	Allocation: RANDOMIZED|Intervention Model: CROSSOVER|Masking: TRIPLE (PARTICIPANT, INVESTIGATOR, OUTCOMES_ASSESSOR)|Primary Purpose: PREVENTION	HUM00156608|2R01NR014484-06	2020-02-24	2024-12-31	2025-06-01	2019-09-25		2024-04-15	USA	University of Michigan, Ann Arbor, Michigan, 48103, United States
"air purifier"	Y	Homes		Children	Asthma	CHILD	NCT02763917	AIRWEIGHS: Investigating Obesity as a Susceptibility Factor for Air Pollution in Childhood Asthma	https://clinicaltrials.gov/study/NCT02763917		ACTIVE_NOT_RECRUITING	Active, not recruiting	Background: Asthma and obesity are public health crises that have concurrently risen over the past decades, affecting millions of children in the United States and disproportionately affecting low-income minority children in urban areas. The same children at highest risk for asthma and obesity also have greater exposure to indoor and outdoor pollution. Emerging evidence suggests that obesity may …	NO	Asthma	DEVICE: Active Air Purifier|DEVICE: Placebo Air Purifier	Maximum Symptom Days, We have chosen symptoms based on the strong relationship between symptoms and PM observed in previous studies. Symptoms during the previous two weeks will be captured with standardized questions used in many inner-city asthma studies, including our own that detected a strong association between indoor PM and asthma symptoms. A 'maximum symptom days' variable will constructed…	Asthma Control, Asthma Control Questionnaire (ACT). This questionnaire assesses asthma control and a score of less than 19 has been linked to poor asthma control. The Asthma Therapy Assessment Questionnaire includes questions about asthma control and will also be used., Baseline and about 12 weeks after the intervention|Asthma Symptoms, The Asthma Symptom Utility Index (ASUI) will be used to asse…			Johns Hopkins University	National Institute of Environmental Health Sciences (NIEHS)	ALL	NA	198	OTHER	INTERVENTIONAL	Allocation: RANDOMIZED|Intervention Model: PARALLEL|Masking: QUADRUPLE (PARTICIPANT, CARE_PROVIDER, INVESTIGATOR, OUTCOMES_ASSESSOR)|Primary Purpose: OTHER	IRB00074171|P50ES018176	2016-08	2024-09	2025-09	2016-05-05		2023-10-19	USA	Meredith McCormack, Baltimore, Maryland, 21224, United States	Hopkins
"air purifier"	Y	Homes		Adults	Cardiovascular	ADULT, OLDER_ADULT	NCT05230784	The PURI-HF (Air Purifiers on Heart Failure) Trial	https://clinicaltrials.gov/study/NCT05230784		RECRUITING	Recruiting	Indoor air pollution and fine mode particulate matter with an aerodynamic diameter smaller than 2.5 micrometers (PM2.5) is a major contributor to global morbidity and mortality, particularly due to cardiovascular disease. This project aims to demonstrate the efficacy, feasibility and effectiveness of portable air filters in improving indoor PM2.5 levels and improving functional capacity of heart …	NO	Heart Failure	OTHER: AirOk Air Purifier|OTHER: Placebo Air Filter	Change in Distance Walked, The distance in meters will be recorded during a 6-minute walk test (MWT), Baseline, 12 months	Change in Systolic Blood Pressure (SBP), Baseline, 12 months|Change in Diastolic Blood Pressure (DBP), Baseline, 12 months|Change in Heart Rate, Baseline, 12 months|Change in pro B-type natriuretic peptide (Pro-BNP) Levels, Baseline, 12 months|Change in Number of Hospitalizations, Baseline, 12 months			NYU Langone Health	National Institute of Environmental Health Sciences (NIEHS)	ALL	NA	600	OTHER	INTERVENTIONAL	Allocation: RANDOMIZED|Intervention Model: PARALLEL|Masking: NONE|Primary Purpose: OTHER	21-00954|R01ES033222	2024-03-06	2025-04-30	2025-04-30	2022-02-09		2024-05-06	India	Centre for Chronic Disease Control (CCDC), Thiruvananthapuram, Kerala, India|All India Institute of Medical Sciences (AIIMS), Delhi, Punjab, India|Public Health Foundation of India (PHFI), LudhiƒÅna, Punjab, India
"air purifier"	Y	Homes		Children	Asthma	CHILD	NCT04331353	The Allergen Reduction and Child Health Study (ARCHS)	https://clinicaltrials.gov/study/NCT04331353	ARCHS	RECRUITING	Recruiting	The Allergen Reduction and Child Health Study (ARCHS) is a 12-month, two group randomized control trial of children with asthma and who are exposed to cockroaches. Children ages 5 - 17 living in the Greater New Orleans area will be recruited from a variety of clinic and community settings. The overall goal of the study is to improve patient-centered asthma outcomes (asthma symptom days, health ca…	NO	Asthma in Children	BEHAVIORAL: Comparator 1 (tailored approach)|BEHAVIORAL: Comparator 2 (insecticidal bait)	Maximum number of symptom days in the previous two weeks, The number of days with asthma symptoms (chest tightness, cough, wheeze, disrupted sleep, limitations on physical activities) in the previous two weeks., 12 Months|Number of participants with an asthma related hospitalization, unscheduled clinic or emergency room visit for asthma in the previous month, Hospitalization or emergency room vis…	Asthma quality of life, Quality of life measured using the Pediatric Asthma Quality of Life Questionnaire. 7 point Likert scale (Minimum:1 Maximum:7) all items are weighted equally. Higher scores indicate higher quality of life., 12 Months|Cockroach exposure, The number of cockroaches in the home and the level of cockroach antigen in the dust, Baseline, 3, 6, 9, 12 months			Tulane University	Patient-Centered Outcomes Research Institute	ALL	NA	290	OTHER	INTERVENTIONAL	Allocation: RANDOMIZED|Intervention Model: PARALLEL|Masking: SINGLE (OUTCOMES_ASSESSOR)|Primary Purpose: TREATMENT	2019-2199|AD-2018C3-14869	2020-11-15	2025-04-30	2025-04-30	2020-04-02		2024-01-16	USA	Tulane University, New Orleans, Louisiana, 70112, United States
"air purifier"	Y	Schools		Children	Cognition	CHILD	NCT06197477	Indoor Air Quality Monitoring and Impact on Children's Health	https://clinicaltrials.gov/study/NCT06197477	LEARN	RECRUITING	Recruiting	This study aims at understanding the relation between indoor air quality in schools, including both chemical and microbiological determinants, and cognition in children by gathering data across different parts of Europe	NO	Cognition	DEVICE: OurAir SQ 1750 - Mobile Air Purification System for indoor|DEVICE: Sham intervention	Change in Correct Detection of continuous Performance Test, Change in the number of times the child responded correctly to the target alphanumeric stimulus. Higher rates of correct detections indicate better attentional capacity., at the end of the intervention and at the end of the sham intervention|Change in the number of correct substitutions of Symbol Digit Modalities Test, Change in the the …				Hasselt University		ALL	NA	900	OTHER	INTERVENTIONAL	Allocation: RANDOMIZED|Intervention Model: CROSSOVER|Masking: SINGLE (PARTICIPANT)|Primary Purpose: BASIC_SCIENCE	Hasselt University	2023-11-20	2025-12	2025-12	2024-01-09		2024-01-09	Belgium	Hasselt University, Diepenbeek, 3590, Belgium
"air purifier"	Y	Homes		Children	Asthma	CHILD	NCT05934370	The Duke-Reinvestment Partners Community Collaborative (DRC)- Healthy Homes	https://clinicaltrials.gov/study/NCT05934370	DRC	RECRUITING	Recruiting	The goal of this open-label, single arm home intervention feasibility study is to improve quality of life for children ages 4-16 years with asthma. The main questions it aims to answer are: * How can Home-Based Environmental Interventions (HEI) improve home air-quality problems in the home? * How can HEI improve asthma outcomes in children? Participants will be receiving HEI and completing asthma…	NO	Asthma in Children	OTHER: Home-Based Environmental Interventions (HEI)	Patient Satisfaction, A measure of satisfaction by distributing a satisfaction survey to each patient and caregiver, Week 10|Caregiver Satisfacation Survey, A measure of satisfaction by distributing a satisfaction survey to each patient and caregiver, Week 10|Change in Air -Quality Index, Air-quality index assessments will include: PM2.5, PM10, total VOC's, formaldehyde, carbon dioxide, Air Quali…	Study Completion, Study completion will be measured when 30 participants enroll and complete the intervention, Through study completion, an average of 24 weeks|Change in Air Quality of Formaldehyde measured by a Temtop M10, The Temtop M10 will measure the amount of Formaldehyde in the home, Week 8|Change in Air Quality of Particulate Matter (PM) measured by a Temtop M10, The Temtop M10 will measu…			Duke University		ALL	NA	30	OTHER	INTERVENTIONAL	Allocation: NA|Intervention Model: SINGLE_GROUP|Masking: NONE|Primary Purpose: TREATMENT	Pro00113089	2023-07-20	2024-08	2024-08	2023-07-07		2023-08-21	USA	Duke University Health System, Durham, North Carolina, 27710, United States
"air purifier"	Y	Schools		Adults and Children	Viral infection	CHILD, ADULT, OLDER_ADULT	NCT06374316	Air Purifiers in Classrooms for Infection Control - a Pilot Study	https://clinicaltrials.gov/study/NCT06374316		ACTIVE_NOT_RECRUITING	Active, not recruiting	This study aims to investigate the acceptability and feasibility of deploying air purifiers equipped with HEPA (high-efficiency particulate air) filters in classrooms, to study air purifiers as an infection control measure. It will also evaluate the direct effect of air purifiers on air quality, comparing ceiling-mounted purifiers, portable purifiers and no purifier.	NO	Feasibility|Acceptability	DEVICE: Ceiling-Mounted Air Purifiers|DEVICE: Portable Air Purifiers|DEVICE: Portable or Ceiling Mounted Air Purifiers	Effectiveness of air purifiers versus no air purifier on improving air quality in classrooms., Air quality will be measured using specialized monitors, capturing key indicators such as particulate matter levels. The data collected will enable a comprehensive evaluation of the effectiveness of air purifiers versus no air purifier in improving the overall air quality in educational settings., 9 wee…	Response rate of class teachers to the study surveys., Consent will be sought from relevant teachers in part 1 schools, and weekly questionnaires will be sent out. Response rates will be described. Results will be supported by answers to interview questions about motivations and challenges in participating in such surveys., 6 weeks|Response rate of students/their guardians to study surveys., Cons…			Norwegian Institute of Public Health	SINTEF Health Research	ALL	NA	6	OTHER_GOV	INTERVENTIONAL	Allocation: NON_RANDOMIZED|Intervention Model: PARALLEL|Masking: NONE|Primary Purpose: OTHER	2302888	2024-01-15	2024-05-01	2024-05-01	2024-04-18		2024-04-18	Norway	Norwegian Institute of Public Health, Oslo, Norway
"air cleaner"	Y	Homes		Adults	COPD	ADULT, OLDER_ADULT	NCT06376994	Multi-Center Clean Air Randomized Controlled Trial in COPD	https://clinicaltrials.gov/study/NCT06376994	Clean Air	NOT_YET_RECRUITING	Not yet recruiting	This is a multi-center randomized, sham-controlled clinical trial to determine the effectiveness of an air cleaner intervention aimed at improving indoor air quality on reducing COPD exacerbation risk and improving quality of life, functional status, rescue medication use.	NO	Chronic Obstructive Pulmonary Disease (COPD)	DEVICE: Air cleaner|DEVICE: Sham air cleaner	St. George's Respiratory Questionnaire (SGRQ), The St. George's Respiratory Questionnaire for COPD Patients (SGRQ-C) is a widely used measure of disease impact as an indicator of disease-specific quality of life. The SGRQ is a disease specific instrument containing 50 items in three subscales (symptoms, activity, and impact)., baseline and 3, 6, 9, and 12 months after baseline				JHSPH Center for Clinical Trials	National Heart, Lung, and Blood Institute (NHLBI)	ALL	PHASE3	770	OTHER	INTERVENTIONAL	Allocation: RANDOMIZED|Intervention Model: PARALLEL|Masking: QUADRUPLE (PARTICIPANT, CARE_PROVIDER, INVESTIGATOR, OUTCOMES_ASSESSOR)|Primary Purpose: PREVENTION	IRB00407311|1U24HL169566-01	2024-09	2027-09	2028-09	2024-04-22		2024-04-22	USA	Johns Hopkins, Baltimore, Maryland, 21224, United States	Hopkins
"air cleaner"	Y	Homes		Adults	COPD	ADULT, OLDER_ADULT	NCT05913765	Air Filtration for COPD in VA Population of Veterans	https://clinicaltrials.gov/study/NCT05913765		RECRUITING	Recruiting	The goal of this study is to investigate the effectiveness of stand-alone air filtration for improving indoor air quality (IAQ) and chronic obstructive pulmonary disease (COPD) outcomes in a high-risk urban cohort of 80 U.S. military veterans with COPD. Secondary goals of the study are to (1) investigate housing-related factors that may contribute to COPD exacerbation, (2) investigate the utility…	NO	Pulmonary Disease, Chronic Obstructive	DEVICE: Air cleaner	COPD exacerbations, Physician diagnosed exacerbation of acute COPD, Through study completion, an average of 1 year	ED visits, Number of emergency room visits, Through study completion, an average of 1 year|Urgent care visits, Number of urgent care visits, Through study completion, an average of 1 year|Unscheduled clinic visits, Number of unscheduled clinic visits, Through study completion, an average of 1 year|6MWD, 6-minute walk distance, At the end of study completion, an average of 1 year|O2 sat, Transcuta…			Illinois Institute of Technology	Jesse Brown VA Medical Center|US Department of Housing and Urban Development|Elevate	ALL	NA	80	OTHER	INTERVENTIONAL	Allocation: RANDOMIZED|Intervention Model: PARALLEL|Masking: SINGLE (PARTICIPANT)|Primary Purpose: TREATMENT	irb-2022-92|ILHHU0049-19|IRB #1675992	2023-01-11	2024-12-31	2025-03-31	2023-06-22		2024-04-25	USA	Jesse Brown Veterans Affairs Medical Center, Chicago, Illinois, 60612, United States
"air cleaner"	Y	Homes		Adults	Cardiovascular	ADULT, OLDER_ADULT	NCT06384625	Developing and Evaluating an Indoor Air Pollution Intervention Among Cardiovascular Patients: the AIRWISE Study	https://clinicaltrials.gov/study/NCT06384625		NOT_YET_RECRUITING	Not yet recruiting	This pilot study (n=20) is a prospective evaluation of the implementation of an indoor air pollution intervention among patients who have undergone recent percutaneous coronary intervention procedures. The intervention, called Air Improvement and Real-time Monitoring for Wellness through Interactive Strategies and Education (AIRWISE), is focused on improving indoor air quality through air filtrat…	NO	Coronary Heart Disease|Cardiovascular Diseases|Environmental Exposure	OTHER: AIRWISE	Evaluate the implementation of an indoor air pollution intervention., As an implementation study, the investigators will administer the AIRWISE intervention to 20 cardiovascular patients and evaluate intervention fidelity, acceptance, and compliance over a 6-month period spanning the 2024 wildfire season. An important outcome measure is to understand how frequently participants use the primary in…	Fine particulate matter (PM2.5), Measure indoor PM2.5 concentrations among participant households during intervention evaluation., 6 months|Life's Essential 8, The investigators will prospectively collect health measures to calculate a metric called Life's Essential 8 (LE8), a construct of cardiovascular health including blood pressure, lipids, glucose, body mass index, nicotine exposure, diet, p…			University of Montana	Providence Heart Institute	ALL	NA	20	OTHER	INTERVENTIONAL	Allocation: NA|Intervention Model: SINGLE_GROUP|Masking: NONE|Primary Purpose: OTHER	361378	2024-06-01	2025-02-01	2025-02-01	2024-04-25		2024-05-14	USA	Providence Health Institute (Montana)
"air cleaner"	Y	Homes		Adults	Cardiovascular	ADULT	NCT05903950	Air Pollution and Cardiovascular Disease in Qatar: an Interventional Study to Reduce Blood Pressure	https://clinicaltrials.gov/study/NCT05903950	APCIQ-BP	RECRUITING	Recruiting	The main objective is to determine if in-home portable air cleaners provide persistent reductions in PM2.5 exposures and improvements in systolic blood pressure and biochemical parameters over 4-weeks in patients with metabolic syndrome residing in Qatar.	NO	Hypertension, Systolic|Metabolic Syndrome	DEVICE: Air cleaners with HEPA filter|DEVICE: Air cleaners without HEPA filter	Change in Systolic Blood Pressure, Mean change from baseline in systolic blood pressure, week 4, week 10	Change in Fasting Glycemia, Mean change from baseline in fasting glycemia, week 4, week 10|Change in Insulin Resistance Index, Mean change from baseline in Insulin Resistance Index, week 4, week 10			Weill Cornell Medical College in Qatar	Hamad Medical Corporation|Case Western Reserve University	ALL	NA	100	OTHER	INTERVENTIONAL	Allocation: RANDOMIZED|Intervention Model: CROSSOVER|Masking: TRIPLE (PARTICIPANT, INVESTIGATOR, OUTCOMES_ASSESSOR)|Primary Purpose: PREVENTION	22-00009	2024-06	2025-08	2025-12	2023-06-15		2024-05-01	Qatar	Hamad Medical Corporation, Doha, Qatar
"air cleaner"	Y	Homes	Yes	Adults	COPD	ADULT, OLDER_ADULT	NCT03658538	Motivational Interviewing and Air Cleaners for Smokers With COPD (MOVE COPD)	https://clinicaltrials.gov/study/NCT03658538	MOVE-COPD	ACTIVE_NOT_RECRUITING	Active, not recruiting	COPD is characterized by lung injury and inflammation caused by noxious particles and gases, including those emanating from cigarette smoke and air pollution. Despite the clear detrimental impact of poor air quality on respiratory outcomes, regardless of smoking status, to investigators' knowledge, there are no studied environmental interventions targeting indoor air quality to improve respirator…	NO	COPD, Chronic Obstructive Pulmonary Disease	DEVICE: Active HEPA Air Cleaner|BEHAVIORAL: Motivational interviewing|DEVICE: Sham Air Cleaner	Change in Quality of Life, St. George's Respiratory Questionnaire (SGRQ). The total score is from 0 to 100. Higher scores indicate more limitations, Baseline and 6 months|Change in Dyspnea as assessed by the University of California San Diego Shortness of Breath Questionnaire (SDSOBQ), Dyspnea will be assessed using the University of California San Diego Shortness of Breath Questionnaire (SDSOBQ)…	Change in COPD health status, COPD health status will be assessed with the COPD assessment test (CAT). The total score is from 0 to 40. Higher scores indicate worse COPD control., Baseline and 6 months|Change in Dyspnea as assessed by modified medical research Council questionnaire(mMRC), Dyspnea will be assessed using the modified medical research Council questionnaire(mMRC). The total score is …	Change in Systemic markers of inflammation in serum (Interleukin-8), Interleukin-8 concentration in serum (units/mg), Baseline and 6 months|Change in Systemic markers of inflammation in serum (C-reactive protein), C-reactive protein concentration in serum will be expressed in: mg/l, Baseline and 6 months|Change in Markers of oxidative stress in urine (8-isoprostane), 8-isoprostane concentration i…		Johns Hopkins University	National Institute of Environmental Health Sciences (NIEHS)	ALL	NA	150	OTHER	INTERVENTIONAL	Allocation: RANDOMIZED|Intervention Model: PARALLEL|Masking: TRIPLE (PARTICIPANT, CARE_PROVIDER, INVESTIGATOR)|Primary Purpose: OTHER	IRB00185955|R01ES029512	2019-06-03	2025-04	2025-07	2018-09-05		2024-06-21	USA	Johns Hopkins Bayview Campus, Baltimore, Maryland, 21224, United States	Hopkins
"air cleaner"	Y	Homes		Children	Asthma	CHILD	NCT02763917	AIRWEIGHS: Investigating Obesity as a Susceptibility Factor for Air Pollution in Childhood Asthma	https://clinicaltrials.gov/study/NCT02763917		ACTIVE_NOT_RECRUITING	Active, not recruiting	Background: Asthma and obesity are public health crises that have concurrently risen over the past decades, affecting millions of children in the United States and disproportionately affecting low-income minority children in urban areas. The same children at highest risk for asthma and obesity also have greater exposure to indoor and outdoor pollution. Emerging evidence suggests that obesity may …	NO	Asthma	DEVICE: Active Air Purifier|DEVICE: Placebo Air Purifier	Maximum Symptom Days, We have chosen symptoms based on the strong relationship between symptoms and PM observed in previous studies. Symptoms during the previous two weeks will be captured with standardized questions used in many inner-city asthma studies, including our own that detected a strong association between indoor PM and asthma symptoms. A 'maximum symptom days' variable will constructed…	Asthma Control, Asthma Control Questionnaire (ACT). This questionnaire assesses asthma control and a score of less than 19 has been linked to poor asthma control. The Asthma Therapy Assessment Questionnaire includes questions about asthma control and will also be used., Baseline and about 12 weeks after the intervention|Asthma Symptoms, The Asthma Symptom Utility Index (ASUI) will be used to asse…			Johns Hopkins University	National Institute of Environmental Health Sciences (NIEHS)	ALL	NA	198	OTHER	INTERVENTIONAL	Allocation: RANDOMIZED|Intervention Model: PARALLEL|Masking: QUADRUPLE (PARTICIPANT, CARE_PROVIDER, INVESTIGATOR, OUTCOMES_ASSESSOR)|Primary Purpose: OTHER	IRB00074171|P50ES018176	2016-08	2024-09	2025-09	2016-05-05		2023-10-19	USA	Meredith McCormack, Baltimore, Maryland, 21224, United States	Hopkins
"air cleaner"	Y	Homes		Adults	Cardiovascular	ADULT, OLDER_ADULT	NCT05874479	Reducing AIR Pollution Exposure to Lower Blood PRESSURE Among New York City Public Housing Residents	https://clinicaltrials.gov/study/NCT05874479	AirPressureNYC	RECRUITING	Recruiting	Fine particulate matter \<2.5 ¬µm (PM2.5) air pollution is the fifth leading risk factor for global mortality, with the largest portion of deaths due to cardiovascular disease (CVD). While several mechanisms are responsible, PM2.5-induced elevations in blood pressure (BP) may be relevant. Indoor portable air cleaners (PACs) are a novel approach to reduce exposure to PM2.5 and potentially lower bl…	NO	Blood Pressure	DEVICE: Active PAC|DEVICE: Sham PAC	Average Self-Measured Morning Home Systolic Blood Pressure (AM H-SBP) over 30 Days, Participants measure HBP every day between 6-9 am., Up to Day 30	Average Self-Measured Morning Home Systolic Blood Pressure (AM H-SBP) over 90 Days, Participants measure HBP every day between 6-9 am., Up to Day 90|Average Self-Measured Morning Home Systolic Blood Pressure (AM H-SBP) over 180 Days, Participants measure HBP every day between 6-9 am., Up to Day 180			NYU Langone Health	National Heart, Lung, and Blood Institute (NHLBI)	ALL	NA	440	OTHER	INTERVENTIONAL	Allocation: RANDOMIZED|Intervention Model: PARALLEL|Masking: DOUBLE (PARTICIPANT, INVESTIGATOR)|Primary Purpose: PREVENTION	23-00517	2023-12-20	2027-09	2028-03	2023-05-25		2023-12-27	USA	NYU Langone Health, New York, New York, 10016, United States
"air cleaner"	Y	Homes		Adults	Cardiopulmonary	ADULT, OLDER_ADULT	NCT05944770	ASPIRE Health Tulare County	https://clinicaltrials.gov/study/NCT05944770	ASPIREHealth	ACTIVE_NOT_RECRUITING	Active, not recruiting	The goal of this clinical trial is to compare indoor air quality and health in people exposed to air pollution, including possible exposure to wildfire smoke. The study will test the effect of using a do-it-yourself (DIY) air cleaner when air pollution is present to answer the following questions: * Do health outcomes differ between participants who use a DIY PAC and those who use a sham air clea…	NO	Respiratory Tract Diseases|Cardiovascular Diseases	OTHER: DIY portable air cleaner with a highly effective filter|OTHER: DIY portable air cleaner with sham filtration	Difference in change in concentrations of biomarkers of inflammation between treatment and control groups, Markers of inflammation include C-reactive protein obtained from fingerstick blood samples, Measured at baseline (pre-intervention) and at two timepoints, at least 3 days apart, during the portable air cleaner usage period (intervention)	Difference in change in concentrations of biomarkers of inflammation between treatment and control groups, Markers of inflammation obtained from nasal epithelial lining fluid analyses, Measured at Baseline and at two timepoints, at least 3 days apart, during the portable air cleaner usage period (intervention)|Symptom data, Symptom/clinical data obtained from questionnaires, At baseline and at on…	air quality measurements, Concentrations of PM2.5, PM10 and volatile organic compounds in air inside participants' homes, Continuous measurement lasting up to 15 weeks		Environmental Protection Agency (EPA)	University of North Carolina, Chapel Hill	ALL	NA	80	FED	INTERVENTIONAL	Allocation: RANDOMIZED|Intervention Model: PARALLEL|Masking: SINGLE (PARTICIPANT)|Primary Purpose: PREVENTION	23-0965	2023-07-29	2023-10-31	2023-10-31	2023-07-13		2023-10-27	USA	Central California Environmental Justice Network, Fresno, California, 93727, United States
"air cleaner"	Y	Homes		Adults	Cardiometabolic	ADULT, OLDER_ADULT	NCT05994937	Cleaner Air for Lower Cardiometabolic Risk	https://clinicaltrials.gov/study/NCT05994937		RECRUITING	Recruiting	The purpose of this interventional sham-controlled pilot study is to study the effects of using portable air cleaners (PACs) in outpatient adults with prediabetes. The primary aims are to determine the effect PAC's have on glycemic variability and the concentrations of circulating biomarkers of inflammation.	NO	PreDiabetes	DEVICE: PAC with HEPA filter intact|DEVICE: PAC with HEPA filter removed	Percent Change in A Continuous Glucose Monitor (CGM) Coefficient of Variation (CV), A CGM will be placed at baseline to continuously measure glucose, which will then be used to assess glycemic variability at the end of 4 weeks post-intervention. This outcome will be measured using the following equation: ((\[post-intervention\]-\[pre-intervention\]))/(\[pre-intervention\])\*100%, Baseline, Week 4…				NYU Langone Health	Doris Duke Charitable Foundation	ALL	NA	142	OTHER	INTERVENTIONAL	Allocation: RANDOMIZED|Intervention Model: PARALLEL|Masking: DOUBLE (PARTICIPANT, CARE_PROVIDER)|Primary Purpose: PREVENTION	23-00755	2023-12-26	2025-06-30	2025-07-30	2023-08-16		2024-02-23	USA	NYU Langone Medical Center, New York, New York, 10016, United States
"air cleaner"	Y	Homes		Adults	Cardiometabolic	ADULT, OLDER_ADULT	NCT06070428	Project 4: ACHIEVE PATHFINDER	https://clinicaltrials.gov/study/NCT06070428	PATHFINDER	RECRUITING	Recruiting	ACHIEVE-P4: PATHFINDER is a randomized, blinded clinical trial of portable air cleaners (PAC) provided at the time of hospital discharge to Heart Failure (HF) patients. It will be carried out at Henry Ford Hospitals. This project is part of the ACHIEVE GREATER (Addressing Cardiometabolic Health Inequities by Early PreVEntion in the GREAT LakEs Region) Center (IRB 100221MP2A), the purpose of which…	NO	Heart Failure	OTHER: PAC provision at hospital discharge|OTHER: Control non-intervention; PAC without filter	The impact of PAC use for 90 days after hospital discharge for HF compared to sham on NTproBNP level., Change in NTproBNP from baseline to 90 days. This will be determined by comparing the NTproBNP value at the 90-day follow up visit versus the baseline NTproBNP value measured from blood draw at enrollment/randomization visit (within 48 hours of hospital discharge)., Baseline at hospital discharg…	The effect of PAC use on home PM2.5 levels in active PAC group versus sham group, Each participant will be provided an indoor PM2.5 sensor to measure in-home PM2.5 levels, Baseline to 90 days|The effect of PAC use on clinical events (death) in the active PAC group versus sham group, Clinical events such as death will be monitored primarily by EMR data., Baseline to 90 days|The effect of PAC use o…	Impact of PAC on hsCRP, hsCRP and hsTroponin will be measured at 30 and 90 days post-enrollment, 30 and 90 days post-enrollment|Impact of PAC use on health status, Change in health status will be evaluated by use of the Kansas City Cardiomyopathy Questionnaire (KCCQ) a validated health status tool for detecting clinically important changes. The score will be represented on a 0-to-100 scale; lower…		Henry Ford Health System	Wayne State University	ALL	NA	400	OTHER	INTERVENTIONAL	Allocation: RANDOMIZED|Intervention Model: PARALLEL|Masking: QUADRUPLE (PARTICIPANT, CARE_PROVIDER, INVESTIGATOR, OUTCOMES_ASSESSOR)|Primary Purpose: TREATMENT	16658	2023-12-18	2026-12	2026-12	2023-10-06		2024-01-12	USA	Henry Ford Health, Detroit, Michigan, 48202, United States
"hepa"	Y	Hospitals		Adults	Hospital outcomes	ADULT, OLDER_ADULT	NCT06286241	Comparison of the Complications in Multiple Myeloma Patients Who Received Autologous Stem Cell Transplantation Between in HEPA-filtered Room and Non-HEPA-filtered Room	https://clinicaltrials.gov/study/NCT06286241	Step down ward	NOT_YET_RECRUITING	Not yet recruiting	The goal of this observational study is to comparison of the complications in multiple myeloma patients who received autologous stem cell transplantation between in HEPA-filtered room and non-HEPA-filtered room. The main questions it aims to answer are: * The incidence of febrile neutropenia, infection, and duration of hospital stay * 2-year progression free survival Participants will be collecte…	NO	Multiple Myeloma		febrile neutropenia, incidence of febrile neutropenia, during admission|Infection, incidence of Infection, during admission|duration of admission, duration of admission, during admission|progression free survival, duration of survival, 2 years				Siriraj Hospital	Faculty of Medicine Siriraj Hospital	ALL		344	OTHER	OBSERVATIONAL	Observational Model: |Time Perspective: p	877/2564(IRB2)	2024-03-25	2024-06-30	2024-07-30	2024-02-29		2024-03-15	Thailand
"hepa"	Y	Homes		Adults	Cardiovascular	ADULT, OLDER_ADULT	NCT04279249	Home Air Filtration for Traffic-Related Air Pollution	https://clinicaltrials.gov/study/NCT04279249	HAFTRAP	RECRUITING	Recruiting	This study is a blinded randomized crossover efficacy trial (N=172 households consisting of 207 participants) of High Efficiency Particulate Air (HEPA) filtration in near-highway homes that lack mechanical air-handling systems. Households will be randomized to 30 days of either filtration or sham filtration followed by a 30 washout period with a subsequent 30-day period of the alternative assignm…	NO	Cardiovascular Risk Factor|Blood Pressure	OTHER: HEPA Air Filtration|OTHER: Sham HEPA Air Filtration	Change in Systolic Blood Pressure at 1 Month, Seated blood pressure measured using ambulatory monitors, measured at study onset and 30 days|Change in High Sensitivity C-Reactive Protein (hsCRP) at 1 Month, inflammation marker assayed from blood samples, blood sample taken at study onset and 30 days	Change in D-dimer at 1 Month, coagulation marker assayed from blood samples, blood sample taken at study onset and 30 days			UConn Health	Somerville Transportation Equity Partnership, Inc.|Welcome Project Inc|Tufts University|Boston University|Olin College of Engineering|National Institute of Environmental Health Sciences (NIEHS)	ALL	NA	210	OTHER	INTERVENTIONAL	Allocation: RANDOMIZED|Intervention Model: CROSSOVER|Masking: DOUBLE (PARTICIPANT, OUTCOMES_ASSESSOR)|Primary Purpose: PREVENTION	20-109-2|1R01ES030289	2020-11-15	2024-05-31	2024-05-31	2020-02-21		2023-06-18	USA	UConn Health, Farmington, Connecticut, 06032, United States
"hepa"	Y	Homes		Children	Respiratory	CHILD	NCT05615870	Bronchiolitis Recovery and the Use of High Efficiency Particulate Air (HEPA) Filters	https://clinicaltrials.gov/study/NCT05615870	BREATHE	ACTIVE_NOT_RECRUITING	Active, not recruiting	This is a multi-center, parallel, double-blind, randomized controlled clinical trial. Children \<12 months of age hospitalized with bronchiolitis are randomized 1:1 to receive a 24-week home intervention with filtration units containing HEPA and carbon filters (in the child's sleep space and a common room) to improve indoor air quality (IAQ) or to a control group with filtration units without HEP…	NO	Bronchiolitis	OTHER: Winix 5500-2 HEPA filtration units	Number of caregiver-reported symptom-free days (SFDs), An SFD is defined as a 24-hour period without coughing, wheezing, or trouble breathing, 24 Weeks	Number of hospitalizations, emergency department or urgent care visits or other unscheduled medical visits for respiratory complaints, 24 weeks|Total quality of life (QOL) score, QOL score is measured by the PedsQLTM Pediatric Quality of Life Inventory Infants Scales questionnaire, 24 weeks|Average Particulate Matter (PM2.5) levels, PM2.5 levels are measured by in-home monitors and scaled to unit…			IDeA States Pediatric Clinical Trials Network	University of Vermont Medical Center|University of Montana|National Institutes of Health (NIH)	ALL	NA	228	NETWORK	INTERVENTIONAL	Allocation: RANDOMIZED|Intervention Model: PARALLEL|Masking: TRIPLE (PARTICIPANT, CARE_PROVIDER, INVESTIGATOR)|Primary Purpose: PREVENTION	274137|U24OD024957	2022-11-07	2024-06	2024-06	2022-11-14		2024-02-20	USA	Alaska Native Tribal Health Consortium, Anchorage, Alaska, 99508, United States|Arkansas Children's Hospital - Little Rock (ACHRI), Little Rock, Arkansas, 72202, United States|Kapi'olani Medical Center for Women and Children, Honolulu, Hawaii, 96826, United States|Kansas University Medical Center, Kansas City, Kansas, 66160, United States|University of Louisville, Louisville, Kentucky, 40292, Uni…
"hepa"	Y	Homes		Adults	Cardiometabolic	OLDER_ADULT	NCT05718245	HEPA, PM2.5, and Cardiometabolic Health	https://clinicaltrials.gov/study/NCT05718245		RECRUITING	Recruiting	The goal of this randomized, double-blind, crossover trial is to test the hypothesis that a longer-term indoor HEPA filtration intervention can improve cardiometabolic profiles by reducing indoor PM2.5 exposures in at-risk individuals.	NO	Air Pollution|Cardiometabolic Health	DEVICE: HEPA filter|DEVICE: Sham filter	Change in HOMA-IR, Difference between baseline and HOMA-IR measured after 6-month intervention, At the baseline and immediately after each of the 6-month interventions|Change in HbA1c, Difference between baseline and HOMA-IR measured after 6-month intervention, At the baseline and immediately after each of the 6-month interventions	Change in fasting glucose, Difference between baseline and fasting glucose measured after 6-month intervention, At the baseline and immediately after each of the 6-month interventions|Change in fasting insulin, Difference between baseline and fasting insulin measured after 6-month intervention, At the baseline and immediately after each of the 6-month interventions|Changes in lipid profiles, Diff…			University of Southern California	Duke University	ALL	NA	52	OTHER	INTERVENTIONAL	Allocation: RANDOMIZED|Intervention Model: CROSSOVER|Masking: DOUBLE (PARTICIPANT, INVESTIGATOR)|Primary Purpose: PREVENTION	UL2_Study	2023-03-15	2025-04-01	2025-04-01	2023-02-08		2024-02-05	USA	Keck School of Medicine, University of Southern California, Los Angeles, California, 90033, United States
"hepa"	Y	Schools		Adults and Children	Viral infection	CHILD, ADULT, OLDER_ADULT	NCT05953233	School Inner City Air Study	https://clinicaltrials.gov/study/NCT05953233		NOT_YET_RECRUITING	Not yet recruiting	The goal of this randomized clinical trial is to test the efficacy of high efficiency particulate air (HEPA) cleaners in reducing respiratory viral exposure and infections in elementary school classrooms. Classrooms will be randomized to active vs. sham HEPA cleaners. The main questions it aims to answer are: * Do classroom HEPA cleaners reduce exposure to viruses? * Do classroom HEPA cleaners re…	NO	Viral Infection	OTHER: Active classroom HEPA cleaner|OTHER: Sham classroom HEPA cleaner	Viral pathogen detected in upper respiratory sample, Presence/absence of a respiratory virus in upper respiratory sample, 1 year	Symptomatic respiratory infection (student, teacher), Presence/absence of a cold based on 30 day recall, 1 year|Symptomatic respiratory infection (household member), Presence/absence of a cold based on 30 day recall, 1 year|Viral detection in classroom bioaerosol sample, Viral detection in classroom bioaerosol sample (viral copy number per cubic meter of air), 1 year|Severity of a cold in child u…			Massachusetts General Hospital	Boston Children's Hospital	ALL	NA	200	OTHER	INTERVENTIONAL	Allocation: RANDOMIZED|Intervention Model: PARALLEL|Masking: TRIPLE (PARTICIPANT, CARE_PROVIDER, OUTCOMES_ASSESSOR)|Primary Purpose: PREVENTION	IRB-P00045373	2023-09	2029-08	2030-08	2023-07-20		2023-08-04	USA	Boston Childrens
"hepa"	Y	Hospitals		Adults	Viral infection	ADULT, OLDER_ADULT	NCT05648097	Baldachin: Ceiling HEPA-filtration to Prevent Nosocomial Transmission of COVID-19	https://clinicaltrials.gov/study/NCT05648097		RECRUITING	Recruiting	In this study, a patient space occupied by a patient with confirmed COVID-19 in an open-space multiple bed area in the Intermediate Care Unit will be equipped with a mobile, optimally placed high efficiency particulate air ("HEPA")-equivalent air filtration unit ("Baldachin") in addition to existing hospital policy infection prevention and control measures. The investigators are going to evaluate…	NO	COVID-19	DEVICE: Baldachin	Proportion of nosocomially infected individuals within 4 days after exposure, Assessed by nasopharyngeal swab on day 4 after the last exposure amongst all in the same room exposed patients in cardiovascular open-space Intermediate Care Unit ("IMC") rooms with the environmental interventions vs. open-space IMC rooms without the environmental intervention, 4 days after last exposure	Exposure duration, Expected to be on average hours up to a few days, Period when exposed to a patient with confirmed COVID-19 in the same room|Proportion of immunocompromised patients among those exposed, e.g. patients under treatment with steroids, chemotherapy, At the time of exposure|Preexisting air change rate per hour in the rooms where exposure occurs, At the time of exposure|Age of exposed…			Insel Gruppe AG, University Hospital Bern		ALL	NA	104	OTHER	INTERVENTIONAL	Allocation: NON_RANDOMIZED|Intervention Model: PARALLEL|Masking: NONE|Primary Purpose: PREVENTION	Balda01	2023-09-13	2024-11-30	2024-11-30	2022-12-13		2023-12-06	Switzerland	Inselspital Bern University Hospital, Bern, Canton Of Bern, 3010, Switzerland
"air purification"	Y	Homes		Adults	COPD	ADULT, OLDER_ADULT	NCT04252235	Home Air Purification for Eosinophilic COPD	https://clinicaltrials.gov/study/NCT04252235		ENROLLING_BY_INVITATION	Recruiting	This study evaluates the influence of home air purification on the lung health of adults with eosinophilic COPD. Half of the participants will receive real air purifiers (HEPA filters) and half will receive sham air purifiers.	NO	COPD|Eosinophilia	DEVICE: Air purifier|DEVICE: Sham air purifier	Change in forced expiratory volume in 1 second (FEV1), FEV1 is the volume of air exhaled in the first second of a forced exhalation maneuver. Lower volumes indicate worse lung function., Baseline [3 months before intervention and day of intervention] and post intervention [7 days, 6 months and 12 months]	Change in health status (also called health-related quality of life) by St. George Respiratory Questionnaire, The St. George's Respiratory Questionnaire is scored from 0 to 100. Higher scores indicate more health impairment., Baseline [3 months before intervention and day of intervention] and post-intervention [6 months and 12 months]|Change in respiratory symptoms, The Breathlessness, Cough and …	Change in nasal inflammatory mediators, Concentrations of inflammatory mediators relevant to allergic and non-allergic airway pathophysiology will be measured repeatedly at baseline and post-randomization in the nasal lining fluid by nasosorption. Mediators will include including Eotaxin, Eotaxin-3, GM-CSF, IFN-Œ≥, IL-1Œ±, IL-1Œ≤, IL-2, IL-4, IL-5, IL-6, IL-7, IL-8, IL-8 (HA), IL-10, IL-12/IL-23p…	Beth Israel Deaconess Medical Center	National Institute of Environmental Health Sciences (NIEHS)		ALL	NA	160	OTHER	INTERVENTIONAL	Allocation: RANDOMIZED|Intervention Model: PARALLEL|Masking: QUADRUPLE (PARTICIPANT, CARE_PROVIDER, INVESTIGATOR, OUTCOMES_ASSESSOR)|Primary Purpose: TREATMENT	2019P001129	2021-03-15	2025-06-30	2025-06-30	2020-02-05		2023-10-30	USA
"air purification"	Y	Schools		Adults and Children	Viral infection	CHILD, ADULT, OLDER_ADULT	NCT05569330	Effect of Aerosol Filtering on Infectious Diseases in Day Care	https://clinicaltrials.gov/study/NCT05569330		ACTIVE_NOT_RECRUITING	Active, not recruiting	Effect of aerosol flitration and removal on typical infectious diseases such as upper respiratory tract infectinos is studied in day care. Many filtration methods such as filters and electrical filtering are used to remove aerosol particles from room air.	NO	Upper Respiratory Tract Infection|Diarrhea	OTHER: Air purification	Incident infections, Incident infections among subjects, During the study periods 11/22-4/23 and 11/23-4/24. These are identical for every subject.	Days absent from work, Days absent from work by the parents of sick children, During the study periods 11/22-4/23 and 11/23-4/24. These are identical for every subject.		Helsinki University Central Hospital			ALL	NA	92	OTHER	INTERVENTIONAL	Allocation: NON_RANDOMIZED|Intervention Model: CROSSOVER|Masking: SINGLE (PARTICIPANT)|Primary Purpose: PREVENTION	PK-1	2022-11-01	2024-04-30	2024-04-30	2022-10-06		2023-05-11	Finland
Excluded for size: https://clinicaltrials.gov/study/NCT06247059

## Sheet: pivot1
	Column Labels
	Active, not recruiting		Not yet recruiting		Recruiting		Total Sum of Enrollment	Total Count of Brief Summary
Row Labels	Sum of Enrollment	Count of Brief Summary	Sum of Enrollment	Count of Brief Summary	Sum of Enrollment	Count of Brief Summary
Adults	230	2	1134	3	2295	11	3659	16
Homes	230	2	790	2	2191	10	3211	14
Cardiometabolic					649	4	649	4
USA					649	4	649	4
Cardiopulmonary	80	1					80	1
USA	80	1					80	1
Cardiovascular			20	1	1462	5	1482	6
India					600	1	600	1
Qatar					100	1	100	1
USA			20	1	762	3	782	4
COPD	150	1	770	1	80	1	1000	3
USA	150	1	770	1	80	1	1000	3
Hospitals			344	1	104	1	448	2
Hospital outcomes			344	1			344	1
Thailand			344	1			344	1
Viral infection					104	1	104	1
Switzerland					104	1	104	1
Adults and Children	6	1	200	1			206	2
Schools	6	1	200	1			206	2
Viral infection	6	1	200	1			206	2
Norway	6	1					6	1
USA			200	1			200	1
Children	644	4			1220	3	1864	7
Homes	644	4			320	2	964	6
Asthma	416	3			320	2	736	5
UK	20	1					20	1
USA	396	2			320	2	716	4
Respiratory	228	1					228	1
USA	228	1					228	1
Schools					900	1	900	1
Cognition					900	1	900	1
Belgium					900	1	900	1
Grand Total	880	7	1334	4	3515	14	5729	25
								229.16
	Enrollment		Studies
	#	%	#	%
USA	3815	0.637853	19	0.703704
Outside USA	2166	0.362147	8	0.296296
Adults	3819	0.638522
Children	1864	0.311654
Adults and Children	298	0.0498244
	5981
Homes	4335	0.724795
Schools	1198	0.200301
Hospitals	448	0.0749039
	5981
Cardiometabolic	649	0.10851
Cardiopulmonary	80	0.0133757
Cardiovascular	1482	0.247785
COPD	1160	0.193948
Hospital outcomes	344	0.0575155
Viral infection	402	0.0672128
Asthma	736	0.123056
Bronchiolitis	228	0.0381207
Cognition	900	0.150477
	5981
