# Supplementary material for: Accounting for in situ air cleaner utilization and performance to improve interpretation of patient outcomes in real-world indoor air cleaner intervention trials
Source: Royal Society of Chemistry journal article supplement (doi:10.1039/d4em00648h), 2024-12-26
Supplement: d4em00648h2.pdf [file d4em00648h2.pdf]

Electronic Supplementary Information (ESI) for:

**Accounting for in-situ air cleaner utilization and performance to  
improve interpretation of patient outcomes in real-world indoor air  
cleaner intervention trials**

Saeed Farhoodi<sup>1</sup>, Insung Kang<sup>2,3</sup>, Yicheng Zeng<sup>1</sup>, Kaveeta Jagota<sup>3</sup>, Nancy Karpen<sup>3</sup>,  
Mohammad Heidarinejad<sup>1,3</sup>, Zane Elfessi<sup>4,5</sup>, Israel Rubinstein<sup>3,6,7</sup>, Brent Stephens<sup>1,3\*</sup>

<sup>1</sup> Department of Civil, Architectural, and Environmental Engineering, Illinois Institute of  
Technology, Chicago, IL USA

<sup>2</sup> Department of Civil Engineering, University of Texas at Arlington, Arlington, TX USA

<sup>3</sup> Research and Development Service, Jesse Brown Veterans Affairs Medical Center,  
Chicago, IL USA

<sup>4</sup> College of Pharmacy, University of Illinois Chicago, Chicago, IL USA

<sup>5</sup> Emergency Medicine Service, Jesse Brown Veterans Affairs Medical Center, Chicago,  
IL USA

<sup>6</sup> College of Medicine, University of Illinois Chicago, Chicago, IL USA

<sup>7</sup> Medical Service, Jesse Brown Veterans Affairs Medical Center, Chicago, IL USA

\*Corresponding author:

Brent Stephens, Ph.D.

Professor and Department Chair

Arthur W. Hill Endowed Chair in Sustainability

Department of Civil, Architectural, and Environmental Engineering

Illinois Institute of Technology

Alumni Memorial Hall Room 228E

3201 South Dearborn Street

Chicago, IL 60616

Phone: (312) 567-3629

Email: [brent@iit.edu](mailto:brent@iit.edu)

## **Summary of Recent and Ongoing Clinical Intervention Trials**

Since 2020, at least five systematic reviews of clinical intervention trials to evaluate the health effects (or markers of effects) of indoor air cleaning or filtration have been published, with foci on cardiovascular health [1], biomarkers of cardiorespiratory [2] or cardiovascular health [3], and blood pressure [4,5]. These reviews generally cover articles published between 2008 and 2022. The total number of published air cleaner intervention trials with health outcomes (or markers of outcomes) evaluated in these recent reviews is up to approximately 20 studies with a combined total enrollment of up to approximately 900 participants. Study populations have ranged from children to elderly and from healthy populations to vulnerable populations with underlying health conditions. Sample sizes of intervention trials have ranged from approximately 20 to 200 participants, which would place them generally in the range of sample sizes that are typical for Phase I/II clinical trials [6]. Durations of air cleaner interventions have ranged from half a day to as long as one year, although most have been shorter term, with medians ranging only 7-14 days across the different reviews. Some key recommendations from these reviews are for intervention trials to target larger sample sizes, particularly in higher-risk populations, and with more rigorous study designs (e.g., longer duration, greater specificity in exposure assessment, etc.).

Additionally, we conducted a non-exhaustive search of currently active trials registered on ClinicalTrials.gov focused on indoor air cleaning interventions, meaning they are listed as active and ongoing, recruiting, or in preparation for recruiting (and thus completed trials were intentionally not included). Search terms included: “air clean\*”, “air purif\*”, and “HEPA filt\*”. At least 36 active trials were initially identified as potentially relevant based on search terms, which were then filtered to 27 registered trials that were deemed as relevant to indoor air cleaning/filtration interventions upon closer inspection. The full list is provided as supplemental file to this manuscript. Each registered trial was then inspected for the type of indoor environment (e.g., homes, schools), target sample size, type of air cleaning intervention, and types of clinical outcomes to be assessed, which was used to summarize the current state of trials at a high level. We also attempted to review the published trial protocols for their plans

61 regarding monitoring air cleaner performance or operation, but the registries generally  
62 lacked such details.

63 **Figure S1** shows a summary of these indoor air cleaning intervention trials  
64 currently registered on ClinicalTrials.gov. The total number of participants to be enrolled  
65 targeted by these 27 registered studies over the next three years is around 6,000  
66 people. Approximately two-thirds of the targeted participant enrollment in these  
67 registered studies reside in the U.S., and about two-thirds of targeted participants are  
68 adults. Nearly three-fourths of the targeted participants will receive in-home air cleaning  
69 interventions, with another ~20% in schools and ~8% in hospitals. Clinical outcomes by  
70 target enrollment vary more widely, with the largest fractions focused on cardiovascular  
71 outcomes (25%), chronic obstructive pulmonary disease (COPD) (19%), cognition  
72 (15%), asthma (12%), and cardiometabolic (11%). These data demonstrate that there  
73 are a growing number of intervention trials underway, with an increasing number of  
74 participants compared to what has been conducted (and published) in the recent past.

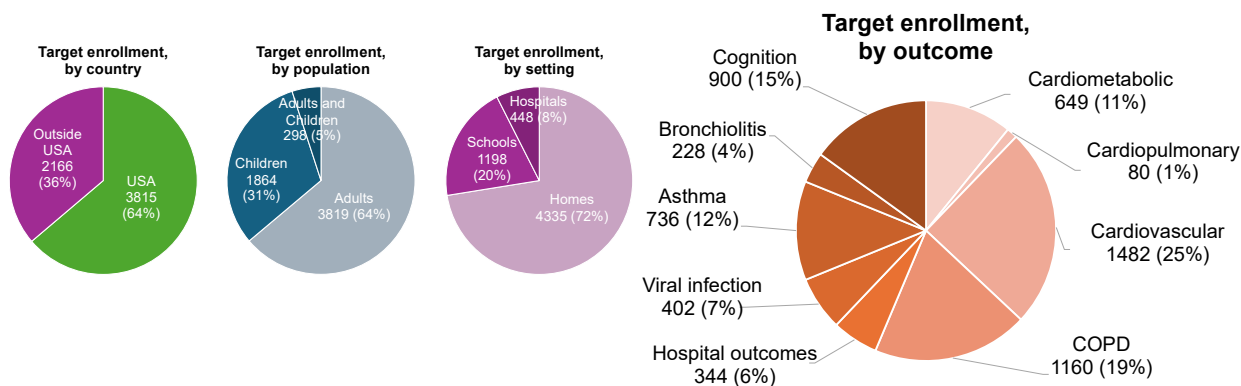

75  
76 **Figure S1.** Summary of currently active trials on indoor air cleaning interventions registered on  
77 ClinicalTrials.gov and the distribution of the total number of target enrolled participants across  
78 geographic region, age, indoor setting, and health outcomes. This summary excludes one  
79 planned study of box fan filters and ultraviolet germicidal irradiation (UVGI) in classrooms in  
80 Bangladesh targeting 20,000 participants in schools  
81 (<https://clinicaltrials.gov/study/NCT06247059>), which would drastically skew the study sample.

## 87 **Air Cleaner Performance Testing**

88       The industry-standard metric of how much pollutant-free air an air cleaner  
89 provides is the clean air delivery rate (CADR) [7]. The CADR is typically reported by  
90 manufacturers (but is not required by law to be reported) in units of equivalent airflow  
91 rate (e.g., cubic feet per minute, or CFM, in the US).<sup>1</sup> When reported, the CADR is often  
92 only reported for the highest fan speed setting, although CADR is typically much lower  
93 at lower fan speed settings. Here we demonstrate an example of conducting an  
94 independent laboratory evaluation of the CADR of a portable air cleaner prior with  
95 HEPA and sorbent media filtration to use in our ongoing intervention trial. The selected  
96 air cleaner has both HEPA filter media for removing airborne particles and activated  
97 carbon and zeolite media for removing airborne gases. Prior to deployment in homes,  
98 the project team modified half of the air cleaners to serve as sham/placebo units,  
99 utilizing custom-made concrete discs wrapped in a covering that securely attach to the  
100 units in place of the filters to maintain similar weight to the true (active) filtration units  
101 (~20 lb or ~9 kg) while leaving in the low-efficiency pre-filter to maintain similar  
102 aesthetics and to obscure the concrete disc.

103       Laboratory measurements were conducted in a large chamber (volume = 1296 ft<sup>3</sup>  
104 [8–10]) to characterize the CADR of both true (active) and sham/placebo air cleaner  
105 units for various constituents following standard protocols [11,12]. The CADR is  
106 traditionally measured for particulate matter but can also be measured for other types of  
107 airborne pollutants [13–16]. Three particle size ranges are commonly tested in the  
108 widely used American National Standards Institute/Association of Home Appliance  
109 Manufacturers (ANSI/AHAM) AC-1 Test Standard, *Method for Measuring the*  
110 *Performance of Portable Household Electric Room Air Cleaners*: tobacco smoke (0.09-1  
111 µm), dust (0.5-3 µm), and pollen (5-10 µm) [7]. In our chamber tests, pollutant injection  
112 was achieved by burning incense to generate particles primarily in the ‘smoke’ and  
113 ‘dust’ size ranges and shaking a vacuum cleaner bag filled with vacuumed dust to  
114 generate particles primarily in the ‘pollen’ size range [17]. Ozone (O<sub>3</sub>) removal tests  
115 were conducted using an ozone generator as the injection source. NO<sub>x</sub> (e.g., NO + NO<sub>2</sub>)

---

<sup>1</sup> One must also be careful in citing manufacturer-reported CADR values, as some manufacturers may report them in non-standard units (e.g., in m<sup>3</sup>/h instead of the conventional ft<sup>3</sup>/min in the US) or may fail to report units altogether.

removal tests were conducted using candle burning as the injection source. Particles were measured using a TSI NanoScan SMPS Model 3910 (0.01-0.4  $\mu\text{m}$  in diameter), MetOne GT-256S OPC (0.3-10  $\mu\text{m}$  in diameter), and TSI OPS 3330 (0.3-10  $\mu\text{m}$  in diameter);  $\text{O}_3$  was measured using a 2B Technologies Model 211  $\text{O}_3$  analyzer; and  $\text{NO}_x$  was measured using a 2B Technologies Model 405  $\text{NO}_x$  analyzer.

Testing was first conducted with the air cleaner turned on immediately after pollutant injection completed. This allows for estimating the decay rate of pollutants with the air cleaner turned on, which includes losses due to the ‘natural’ (i.e., background) decay due to deposition to surfaces, ventilation, etc., in addition to the effect of the operating air cleaner. After pollutant concentrations over time ( $C_t$ ) initially mixed, peaked, and then decayed from the initial peak ( $C_0$ ) towards background levels in the chamber ( $C_{bg}$ ), pollutant injection was repeated with the air cleaner turned off, and pollutant concentrations were allowed to decay with the air cleaner off to characterize only the ‘natural’ (i.e., background) decay rate. A linear regression is used to estimate pollutant loss rates ( $K$ ) under air cleaner on ( $K_{ac}$ ) and off ( $K_{nat}$ ) conditions (Equation S1).

$$-\ln \frac{C_{in,t} - C_{bg}}{C_{in,t=0} - C_{bg}} = K \times t \quad (\text{S1})$$

The CADR is calculated as the difference between the two loss rates multiplied by the interior chamber volume (Equation S2).

$$CADR = V \times (K_{on} - K_{off}) \quad (\text{S2})$$

Where  $V$  = volume of the test chamber ( $\text{ft}^3$  or  $\text{m}^3$ ),  $K_{on}$  = total decay rate with air cleaner on (1/min or 1/hour),  $K_{off}$  = natural decay rate with air cleaner off (1/min or 1/hour), and  $t$  = time from the beginning of the decay period (min or hour). This approach to measuring CADR is tailored specifically to portable or in-room air cleaners, but can also be extended to in-duct devices in central forced air heating or cooling systems [18].

Particulate CADR tests were also conducted with the sham air cleaners with just the pre-filters installed and operating on high. Supply air velocities at the air outlet of

one unit each of the active and sham air cleaners were measured on all fan speed settings using a Digi-Sense Data Logging Vane Anemometer logging at 10-second intervals for several minutes. Noise levels were also measured ~1 m away from air outlet air of one unit each of the active and sham air cleaners using the National Institute for Occupational Safety and Health [NIOSH] Sound Level Meter app in the chamber.

Figure S2 shows an example of particle removal tests conducted on an air cleaner in a large chamber and Table S1 shows overall results from this testing.

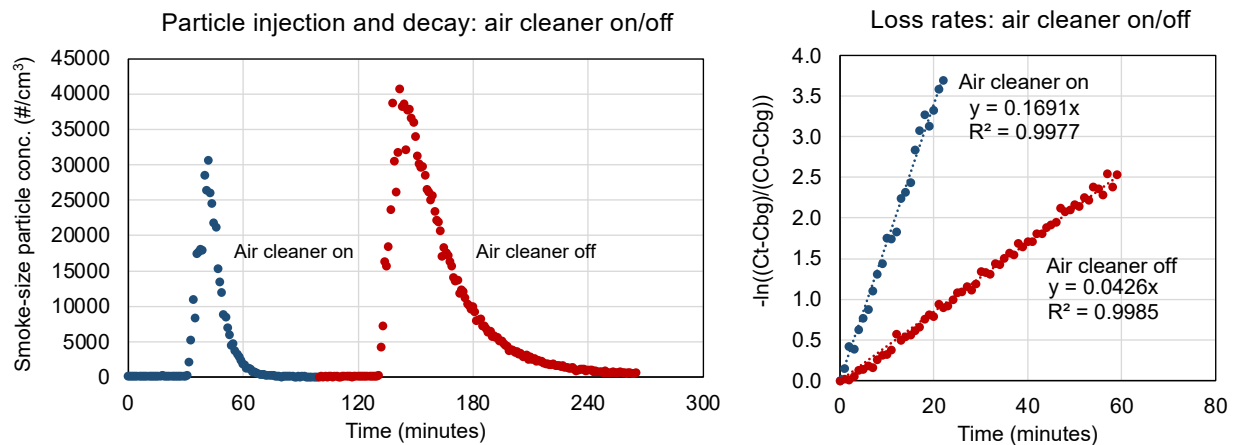

**Figure S2.** Data from particle removal tests (smoke-sized particles) of an air cleaner operating on high fan speed.

**Table S1.** Results from laboratory testing of an air cleaner used in an ongoing trial.

| Condition | Fan speed | Measured CADR, ft <sup>3</sup> /min (m <sup>3</sup> /h) |                 |                  |                 |                | Sound pressure level, dBA* | Supply air velocity, m/s |
|-----------|-----------|---------------------------------------------------------|-----------------|------------------|-----------------|----------------|----------------------------|--------------------------|
|           |           | Smoke (0.09-1 µm)                                       | Dust (0.5-3 µm) | Pollen (5-11 µm) | NO <sub>2</sub> | O <sub>3</sub> |                            |                          |
| Active    | Low       | 49<br>(83)                                              | 45<br>(77)      | 28<br>(48)       | 47<br>(80)      | 80<br>(136)    | 39                         | 1.9                      |
|           | Medium    | 78<br>(133)                                             | 61<br>(104)     | 44<br>(75)       | 79<br>(134)     | 95<br>(162)    | 48                         | 3.4                      |
|           | High      | 164<br>(279)                                            | 171<br>(291)    | 114<br>(194)     | 159<br>(270)    | 167<br>(284)   | 62                         | 5.9                      |
| Sham      | Low       | n/a                                                     | n/a             | n/a              | n/a             | n/a            | 40                         | 3.1                      |
|           | Medium    | n/a                                                     | n/a             | n/a              | n/a             | n/a            | 46                         | 4.7                      |
|           | High      | 8<br>(14)                                               | 5<br>(8)        | 27<br>(46)       | n/a             | n/a            | 61                         | 9.1                      |

\*The sound level in the chamber without the air cleaner operating was 35 dBA

The resulting CADR for smoke-sized particles (i.e., 0.09-1 µm) of this air cleaner was ~50 ft<sup>3</sup>/min (~85 m<sup>3</sup>/h) on low fan speed, ~80 ft<sup>3</sup>/min (~136 m<sup>3</sup>/h) on medium fan

159 speed, and ~160 ft<sup>3</sup>/min (~272 m<sup>3</sup>/h) on high fan speed settings with the true filters  
160 installed and less than 10 cfm for all fan speeds with the sham installed. The CADR for  
161 dust-sized particles were similar, as is expected for the air cleaner with HEPA media  
162 since HEPA filters remove particles of all sizes with approximately the same single-pass  
163 efficiency (near 100%): ~45 ft<sup>3</sup>/min (~77 m<sup>3</sup>/h) on low fan speed, ~61 ft<sup>3</sup>/min (~104 m<sup>3</sup>/h)  
164 on medium fan speed, and ~171 ft<sup>3</sup>/min (~291 m<sup>3</sup>/h) on high fan speed settings with the  
165 true filters installed. The pollen-size CADR measurements are the least reliable given  
166 the challenges of aerosolizing large particles with the particle generation methods used  
167 herein. Results in Table S1 summarize results from singular tests; although not shown  
168 here, replicate tests were also conducted on low and high fan speed and resulting  
169 estimates of CADR for the different particle size ranges were generally within ~10% of  
170 each other (i.e., within ~10-15 CFM, or ~17-25 m<sup>3</sup>/h). This range of repeatability is  
171 similar to other tests we have conducted: [https://built-envi.com/portfolio/air-cleaner-](https://built-envi.com/portfolio/air-cleaner-testing/)  
172 [testing/](https://built-envi.com/portfolio/air-cleaner-testing/).

173         The CADR for NO<sub>2</sub> and O<sub>3</sub> were both estimated to be similar to the particulate  
174 matter CADRs, which suggests that the removal efficiency of the filters inside the units  
175 are high and removal efficacy (CADR) is potentially flow-limited rather than filter-limited.  
176 Worth noting is that these methods to measure the CADR for NO<sub>2</sub> and O<sub>3</sub> are  
177 experimental in nature (e.g., similar to [19]) because there are no established industry-  
178 standard test methods for measuring CADR for NO<sub>2</sub> or O<sub>3</sub>; thus, to our knowledge, no  
179 manufacturers report CADR for either pollutant. The larger CADR for O<sub>3</sub> is probably also  
180 due to a combination of enhanced mixing in the chamber that increases reactive  
181 deposition to surfaces in the chamber and thus may present a somewhat inflated CADR  
182 compared to true CADR; however, this remains to be investigated in more depth in  
183 future work.

184         Noise production on the highest fan speed setting was significantly higher than  
185 both medium and low fan speed settings (e.g., 61-62 dBA versus 46-48 dBA and 39-40  
186 dBA, respectively). Spot measurements of the power draw of the air cleaners showed  
187 power draw of ~45-55 W on low, ~60-75 W on medium, and ~95-110 W on high fan  
188 speed settings for both true and sham filters, with slightly higher power draws for sham  
189 filters (<10%) due to the reduced resistance to airflow without the filter installed. Supply

190 air velocities measured directly at the center of the air outlet were ~40-60% higher with  
191 the sham air cleaners (HEPA and carbon filter removed) compared to the true air  
192 cleaners, although a minor change in power draw (<10%) suggests that the difference in  
193 overall airflow rate being delivered is likely no more than ~10%, which should not result  
194 in perceptible differences in flow characteristics coming from the true versus sham air  
195 cleaners. However, airflow perceptions between sham and true filter conditions were not  
196 investigated in more detail (and in our experience, the vast majority of prior trials have  
197 not reported this detail either).

198

### 199 **In-situ air cleaner utilization measurements**

200 Figure S3 shows an example of a few days of power draw measurements from  
201 this ongoing study. The power draw data can be tagged and sorted into bins of “off” (<1  
202 W), “low” (40-55 W), “medium” (60-70W), or “high” (80-110W) to indicate fan speed  
203 setting for this specific air cleaner. It is worth noting that these data are not meant to be  
204 representative of all air cleaner usage; it is simply used as an example to illustrate the  
205 different fan speed settings that are detectable via long-term power draw  
206 measurements. For the first 53 homes in our preliminary data set, the average initial  
207 power draw of the air cleaners measured on low, medium, and high fan speed settings  
208 was 53 W, 70 W, and 101 W for the true air cleaners and 53 W, 70 W, and 108 W for  
209 the sham air cleaners. The slight differences between true and sham air cleaners within  
210 a fan speed setting were smaller than the differences between fan speed settings,  
211 which allowed for easy resolution of low, medium, and high fan speed settings in the  
212 resulting field-collected data set. For other types of air cleaner makes and models,  
213 careful investigation of the power draw on low, medium, high, or other fan speed modes  
214 such as auto mode, including before, during, and after data collection, is warranted to  
215 clearly define the ranges of operation.

216 For reference, for those few participants who have already completed the  
217 yearlong study thus far, the Onset HOBO plug load logger battery level has remained  
218 above 80% after one year and about 50% of the data storage is typically used (~2100  
219 kB out of 4032 kB), suggesting that these loggers can be used for nearly 2 years at 5-



220 minute intervals, and that storage space is likely depleted before battery life (and thus  
221 longer logging intervals would likely extend this range).

222

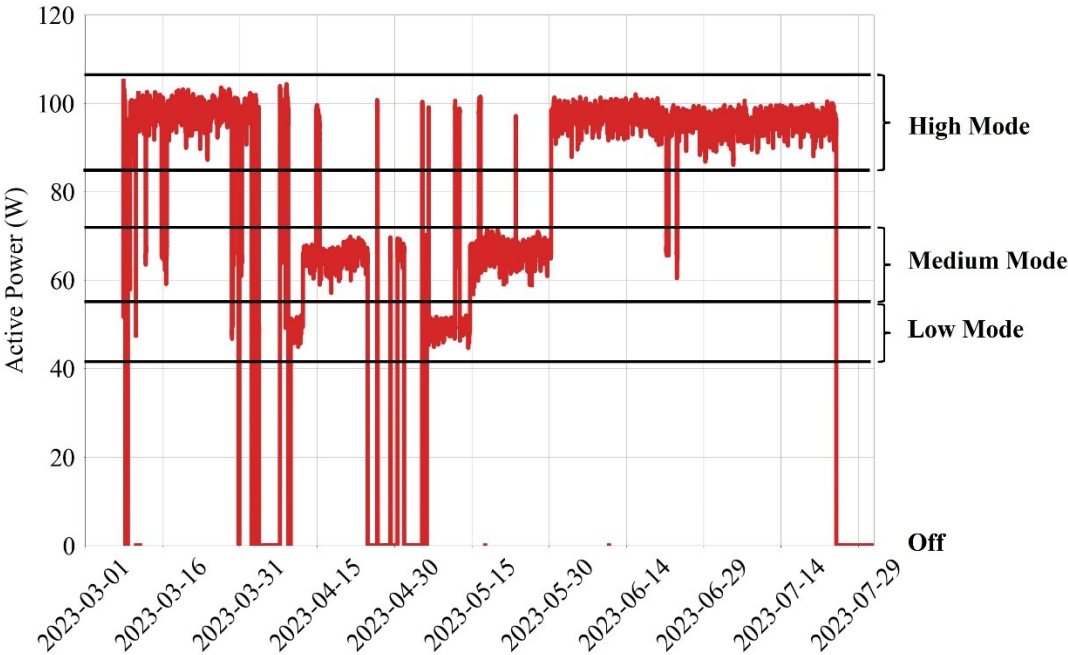

223

224 **Figure S3.** An example of power draw data at 5-minute resolution retrieved from a plug load  
225 logger installed on an air cleaner for approximately 5 months in a participant's home

226 Figure S4 summarizes the hourly mean (and standard deviation) of the air  
227 cleaner power draw measurements from the sample of 53 homes for which we have  
228 interim data to date. To generate the figure, the mean and standard deviation of the  
229 measured power draw from the plug load loggers attached to the portable air cleaners  
230 (PACs) were calculated for each hour of the day for each home. These values were  
231 then averaged across all homes. This approach accounts for the varying data collection  
232 periods among the assessed homes, which differ significantly at this interim stage (i.e.,  
233 from 11 to 500 days, as mentioned). To date, there are minimal diurnal variations in  
234 average air cleaner power draw, suggesting that participants rarely adjusted fan speed  
235 settings throughout the day. Rather, they tended to keep the same fan speed setting for  
236 long periods of time. Future work with the full data set will explore operational patterns  
237 in more detail.

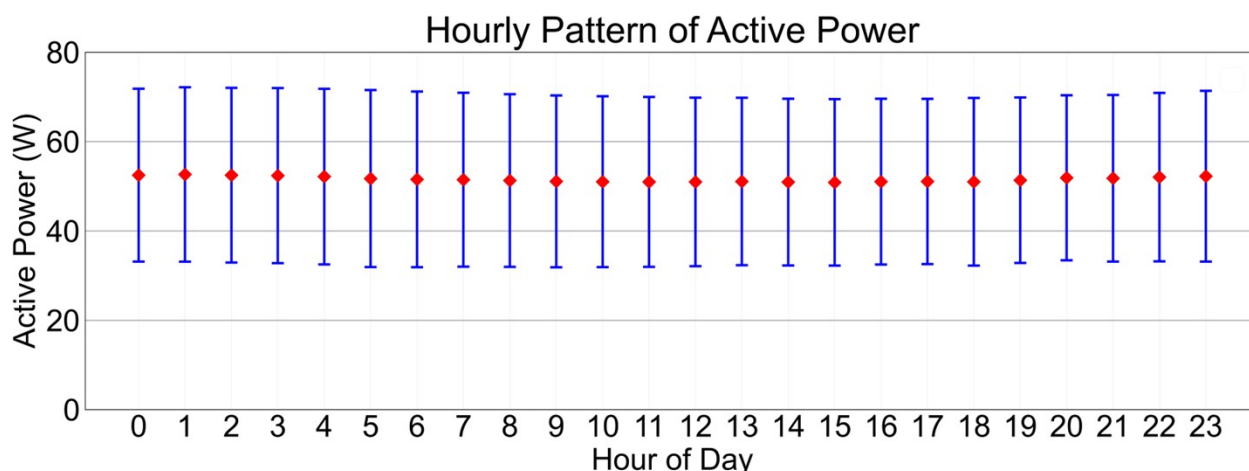

**Figure S4.** Hourly mean (standard deviation) of air cleaner power draw from the sample of 53 homes for which we have interim data to date

## ESI References

1. Xia X, Chan KH, Lam KBH, Qiu H, Li Z, Yim SHL, et al. Effectiveness of indoor air purification intervention in improving cardiovascular health: A systematic review and meta-analysis of randomized controlled trials. *Sci Total Environ.* 2021 Oct;789:147882.
2. Liu S, Wu R, Zhu Y, Wang T, Fang J, Xie Y, et al. The effect of using personal-level indoor air cleaners and respirators on biomarkers of cardiorespiratory health: a systematic review. *Environ Int.* 2022 Jan;158:106981.
3. Wittkopp S, Walzer D, Thorpe L, Roberts T, Xia Y, Gordon T, et al. Portable air cleaner use and biomarkers of inflammation: A systematic review and meta-analysis. *Am Heart J Plus Cardiol Res Pract.* 2022 Jun;18:100182.
4. Walzer D, Gordon T, Thorpe L, Thurston G, Xia Y, Zhong H, et al. Effects of Home Particulate Air Filtration on Blood Pressure: A Systematic Review. *Hypertension.* 2020 Jul;76(1):44–50.
5. Faridi S, Allen RW, Brook RD, Yousefian F, Hassanvand MS, Carlsten C. An updated systematic review and meta-analysis on portable air cleaners and blood pressure: Recommendations for users and manufacturers. *Ecotoxicol Environ Saf.* 2023 Sep;263:115227.
6. NIH. NIH Clinical Research Trials and You [Internet]. National Institutes of Health. 2022. Available from: <https://www.nih.gov/health-information/nih-clinical-research-trials-you/basics>
7. ANSI/AHAM. ANSI/AHAM Standard AC-1: Method for Measuring Performance of Portable Household Electric Room Air Cleaners. Association of Home Appliance Manufacturers; 2020.

- 265 8. Zeng Y, Heidarinejad M, Stephens B. Evaluation of an in-duct bipolar ionization device on  
266 particulate matter and gas-phase constituents in a large test chamber. *Build Environ.* 2022  
267 Apr;213:108858.
- 268 9. Zeng Y, Laguerre A, Gall ET, Heidarinejad M, Stephens B. Experimental Evaluations of  
269 the Impact of an Additive Oxidizing Electronic Air Cleaner on Particles and Gases.  
270 Pollutants. 2022 Apr 6;2(2):98–134.
- 271 10. Zeng Y, Manwatkar P, Laguerre A, Beke M, Kang I, Ali AS, et al. Evaluating a  
272 commercially available in-duct bipolar ionization device for pollutant removal and potential  
273 byproduct formation. *Build Environ.* 2021 May;195:107750.
- 274 11. Shaughnessy RJ, Sextro RG. What Is an Effective Portable Air Cleaning Device? A  
275 Review. *J Occup Environ Hyg.* 2006 Apr;3(4):169–81.
- 276 12. AHAM. Certified Room Air Cleaners [Internet]. Association of Home Appliance  
277 Manufacturers; 2019. Available from: <https://www.ahamdir.com>
- 278 13. Howard-Reed C, Nabinger SJ, Emmerich SJ. Characterizing gaseous air cleaner  
279 performance in the field. *Build Environ.* 2008 Mar;43(3):368–77.
- 280 14. Kim HJ, Han B, Kim YJ, Yoon YH, Oda T. Efficient test method for evaluating gas  
281 removal performance of room air cleaners using FTIR measurement and CADR calculation.  
282 *Build Environ.* 2012 Jan;47:385–93.
- 283 15. Rajapakse MY, Pistochini TE, Borrás E, McCartney MM, Davis CE. Controlled air  
284 exchange rate method to evaluate reduction of volatile organic compounds by indoor air  
285 cleaners. *Chemosphere.* 2023 Feb;313:137528.
- 286 16. Schumacher S, Caspari A, Schneiderwind U, Staack K, Sager U, Asbach C. The Drawback  
287 of Optimizing Air Cleaner Filters for the Adsorption of Formaldehyde. *Atmosphere.* 2024  
288 Jan 16;15(1):109.
- 289 17. Stephens B, Siegel JA. Comparison of test methods for determining the particle removal  
290 efficiency of filters in residential and light-commercial central HVAC systems. *Aerosol Sci*  
291 *Technol.* 2012 May;46(5):504–13.
- 292 18. MacIntosh DL, Myatt TA, Ludwig JF, Baker BJ, Suh HH, Spengler JD. Whole house  
293 particle removal and clean air delivery rates for in-duct and portable ventilation systems. *J*  
294 *Air Waste Manag Assoc.* 2008 Nov;58(11):1474–82.
- 295 19. Daisey JM, Hodgson AT. Initial efficiencies of air cleaners for the removal of nitrogen  
296 dioxide and volatile organic compounds. *Atmospheric Environ* 1967. 1989 Jan;23(9):1885–  
297 92.
- 298
